# Supplementary material for: Superhydrophobic surfaces allow probing of exosome self organization using X-ray scattering
Source: Royal Society of Chemistry journal article supplement (doi:10.1039/c3nr34032e), 2013-01-01
Supplement: c3nr34032e.pdf [file c3nr34032e.pdf]

## Supplementary Information

# Superhydrophobic Surfaces allow X-ray Scattering Probing of Exosomes self organization

Angelo Accardo, Luca Tirinato, Davide Altamura, Teresa Sibillano, Cinzia Giannini, Christian Riekkel, Enzo Di Fabrizio

### SEM Images of the Exosomes residuals

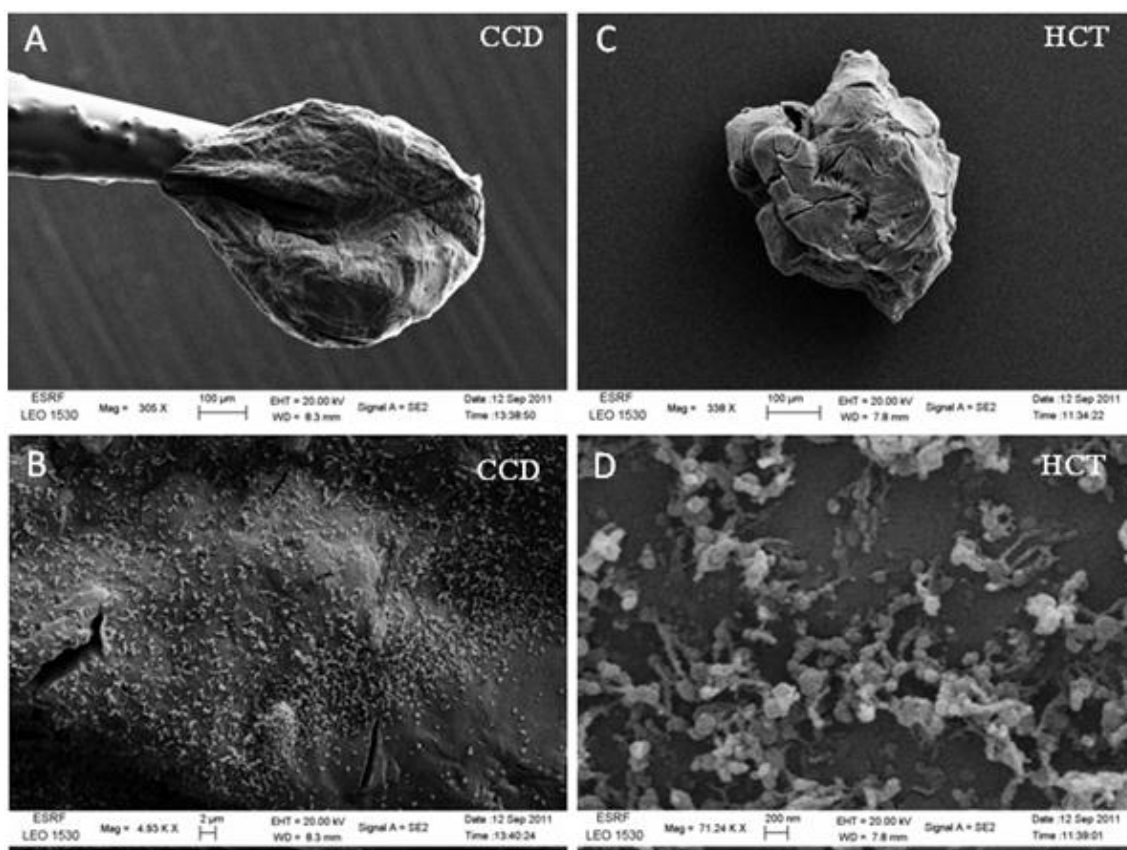

Figure S1 A,B: SEM images of exosome residue from the CCD841-CoN cell line attached to a glass capillary tip; C,D: SEM images of exosome residue from the HCT116 colon cell line

## SR microWAXS experiments

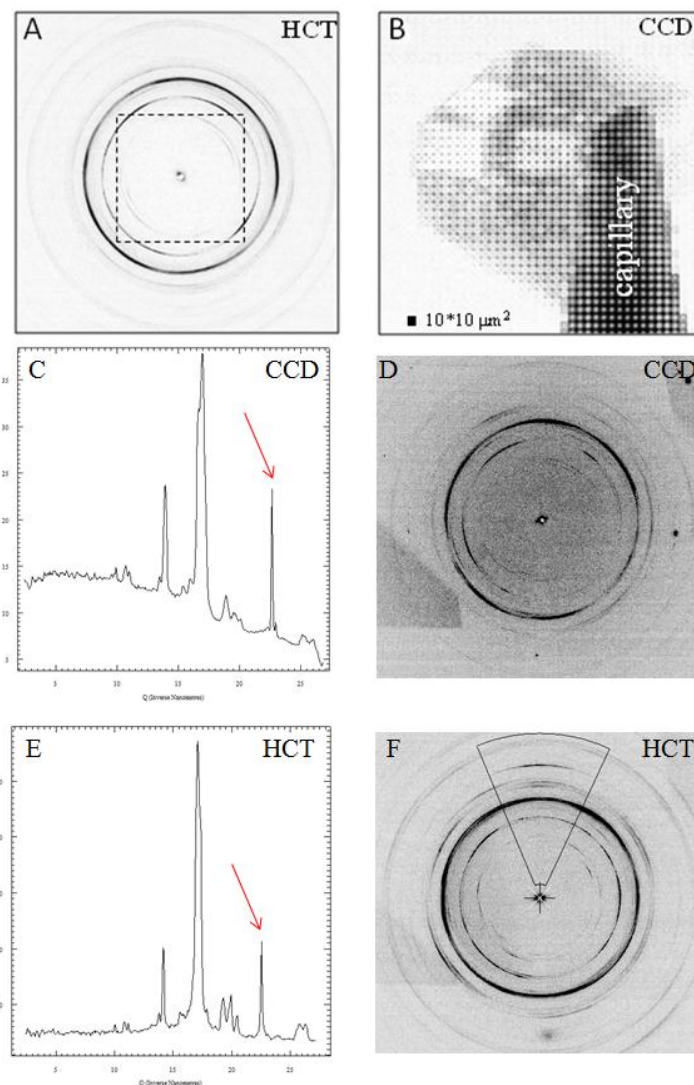

*Figure S2* A: HCT microWAXS pattern; B: Composite Diffraction Image for CCD residue. Each pixel contains the area defined by a square in Fig.S2A; C-F: azimuthally averaged plots and related selected microWAXS patterns of CCD and HCT exosomes showing the peak at  $22.5 \text{ nm}^{-1}$  detected at the XMI Lab.

A composite diffraction image<sup>1</sup> based on a raster-diffraction scan with  $10 \mu\text{m}$  step increment across the CCD-residue is shown in Figure S2B. The individual pixels correspond to diffraction patterns which are limited to the area defined by the square in Figure S2A. The raster-diffraction image allows discerning the shape of the glass capillary from the residue (Figure S2B). The residue shows inhomogeneities due to different thicknesses which the X-ray microbeam probes.

Figures S2C-F show the presence of the peak at  $22.5 \text{ nm}^{-1}$  in selected HCT and CCD patterns collected at the ID13 beamline with the  $1 \mu\text{m}$  beam. The same peak was detected by the analysis of the same residuals at the XMI Lab with the  $200 \mu\text{m}$  beam.

## Synchrotron Radiation Experiments

The distances were calibrated by diffraction patterns from corundum and Ag behenate powder speckles.<sup>2</sup>

## References

- (1) Riekell, C.; Burghammer, M.; Davies, R.; Gebhardt, R.; Popov, D. In *Applications of Synchrotron Light to Scattering and Diffraction in Materials*; Ezquerro, T. A., Garcia-Gutierrez, M., Nogales, A., Gomez, M., Eds.; Springer: Heidelberg, 2009; Vol. 776, p 91.
- (2) Blanton, T. N.; Huang, T. C.; Toraya, H.; Hubbard, C. R.; Robie, S. B.; Louer, D.; Goebel, H. E.; Will, G.; Gilles, R.; Raftery, T. *Power Diffraction* **1995**, *10*, 91.
